# Supplementary material
Source: MDPI journal article supplement (https://www.mdpi.com/2073-4441/15/13/2403)
Supplement: s1 [file s1]

**Table S1.**The main characteristic of studied UV filters.

| Compound | Chemical structure                                                                  | Molecular weight | Log K <sub>ow</sub> |
|----------|-------------------------------------------------------------------------------------|------------------|---------------------|
| BP-1     | 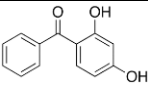   | 214.22           | 3.15                |
| BP-2     |    | 246.21           | 2.78                |
| BP-3     |    | 228.24           | 3.79                |
| 4-MBC    |    | 254.37           | 5.92                |
| OCR      |    | 361.48           | 6.88                |
| EHMC     |    | 290.40           | 5.80                |
| EHS      |   | 250.33           | 6.36                |
| HMS      |  | 262.36           | 6.34                |
| BMDM     |  | 310.39           | 4.51                |
