# Supplementary material
Source: MDPI journal article supplement (https://www.mdpi.com/2073-4441/15/13/2403)
Supplement: s1 [file s1]

**Table S2.** The calibration curve parameters and detection limits of nine UV filters.

| Compound | Correlation Coefficient ( $r^2$ ) | LOD<br>$\mu\text{g}\cdot\text{L}^{-1}$ | LOQ<br>$\mu\text{g}\cdot\text{L}^{-1}$ | Wavelength (nm) |
|----------|-----------------------------------|----------------------------------------|----------------------------------------|-----------------|
| BP-1     | 0.9998                            | 0.023                                  | 0.067                                  | 280             |
| BP-2     | 0.9993                            | 0.020                                  | 0.061                                  | 280             |
| BP-3     | 0.9993                            | 0.024                                  | 0.070                                  | 280             |
| 4-MBC    | 0.9992                            | 0.023                                  | 0.068                                  | 305             |
| OCR      | 0.9984                            | 0.026                                  | 0.052                                  | 305             |
| EHMC     | 0.9986                            | 0.022                                  | 0.065                                  | 305             |
| EHS      | 0.9986                            | 0.016                                  | 0.047                                  | 230             |
| HMS      | 0.9984                            | 0.018                                  | 0.064                                  | 230             |
| BMDM     | 0.0998                            | 0.017                                  | 0.052                                  | 360             |
